# Supplementary material for: New Disulfiram Derivatives as MAGL-Selective Inhibitors
Source: MDPI journal article supplement (doi:10.3390/molecules26113296), 2021-05-30
Supplement: s1 [file s1]

## Supplementary material

### New disulfiram derivatives as MAGL-selective inhibitors

**Ziad Omran<sup>1</sup>**

Department of Pharmaceutical Sciences, Pharmacy Program, Batterjee Medical College,  
21442 Jeddah, Saudi Arabia

#### Table of Contents

|                                                |         |
|------------------------------------------------|---------|
| Synthesis of compounds <b>1g</b>               | Page 2  |
| Synthesis of compounds <b>1k</b> and <b>1l</b> | Page 2  |
| Analytical data for compound <b>2g</b>         | Page 4  |
| Analytical data for compound <b>2l</b>         | Page 11 |

---

<sup>1</sup> To whom correspondence should be addressed. e-mail: [ziad.omran@bmc.edu.sa](mailto:ziad.omran@bmc.edu.sa)

### Synthesis of amine **1g**:

Amine (**1g**) was obtained by amination of 3-bromopropanoate (**3**) by benzylethylamine. Debenzylation of amine (**4**) by reductive cleavage over palladium metal with molecular hydrogen yielded the desired amine (**1g**), Figure S-1.

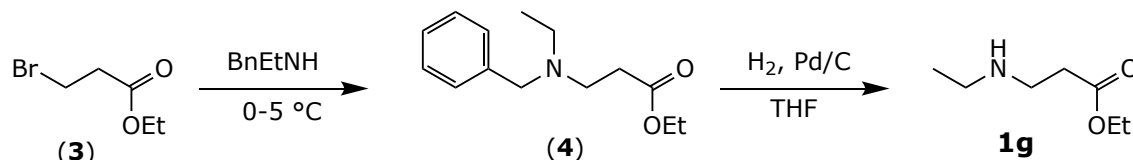

**Figure S-1.** Synthesis of Amine (**1g**).

### Ethyl 3-(benzyl(ethyl)amino)propanoate (**4**):

To 2.6 mL (20 mmol) of ethyl 3-bromopropanoate (**3**) cooled to (0-5°C) was added dropwise during 5 min 6 mL (40 mmol) of benzylethylamine under vigorously stirring. After few minutes, the solution become solid. To this solid was added 30 mL of diethyl ether. The suspension was stirred vigorously for 5 min, filtered and the filtrate was concentrated in vacuo to give 3.6 g of an oil which is engaged in the next step without further purification. Yield: 76 % (light yellow oil), FT-IR: 3028, 2972, 2935, 2802, 1732, 1452, 1369, 1247, 1192, 1161, 1045, 1028 cm<sup>-1</sup>. <sup>1</sup>H NMR (400 MHz, CDCl<sub>3</sub>): 1.03 (3H, t, <sup>3</sup>J=7.2Hz), 1.23 (3H, t, <sup>3</sup>J=7.2Hz), 2.40-2.56 (4H, m), 3.58 (2H, s), 4.11 (2H, q, <sup>3</sup>J=7.2Hz), 7.20-7.35 (5H, m).

### Ethyl 3-*N*-ethylaminopropanoate (**1g**):

To 2.55 g (10.8 mmol.) of ethyl 3-*N*-ethylbenzylaminopropanoate diluted in 50 mL of THF was added cautiously 1 g of palladium 10 % on carbon. The suspension was hydrogenated at atmospheric pressure and room temperature for 6 hours. The reactional medium was degassed and the suspension was filtered on a pad of celite to remove the catalyst. The filtrate is concentrated in vacuo (bath temperature at 35°C to avoid amidification) to give 1.48 g of compound (**1g**) as an oil. Yield: 94 % (light yellow oil). FT-IR: 3313, 2968, 2937, 2827, 1730, 1446, 1373, 1186, 1141, 1026 cm<sup>-1</sup>. <sup>1</sup>H NMR (400 MHz, CDCl<sub>3</sub>): 1.11 (3H, t, <sup>3</sup>J=7.2Hz), 1.26 (3H, t, <sup>3</sup>J=7.2Hz), 2.52 (2H, t, <sup>3</sup>J=6.4Hz), 2.66 (2H, q, <sup>3</sup>J=7.2Hz), 2.89 (2H, t, <sup>3</sup>J=6.4Hz), 4.14 (2H, q, <sup>3</sup>J=7.2Hz).

### Synthesis of amine (**1l**):

Amine (**1l**) was obtained by reductive amination of commercial 4-formylbenzoic acid (**5**) using 2 equivalents of ethylamine in methanol and reducing the intermediate imine by sodium borohydride. The obtained amine (**1k**) was then esterified in refluxing ethanol to give the aimed amine (**1l**), Figure S-2.

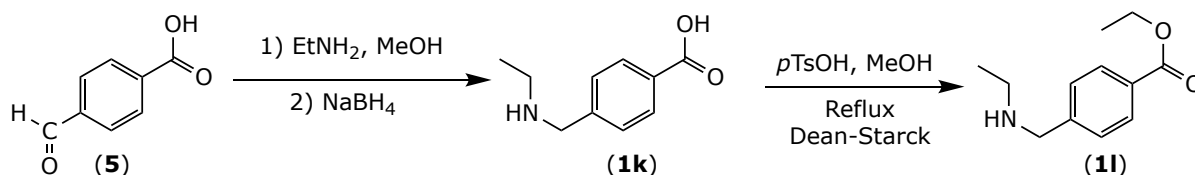

**Figure S-2.** Synthesis of amines (**1k** and **1l**).

#### 4-((ethylamino)methyl)-benzoic acid (**1k**):

To a cold solution of 4.50 g (30 mmol) of commercial 4-formylbenzoic acid dissolved in 50 mL of dry methanol was added 20 g of molecular sieves (4A) and 67 mL of ethylamine 0.9 M in methanol. The suspension was stirred 14 hours at R.T. and filtered. To the cold filtrate was added 2.2 g (30 mmol.) of sodium borohydride by portions and the solution was stirred 15 hours. The mixture was concentrated to dryness in vacuo and cold water was added. To the aqueous layer was added HCl conc. (5 mL) to reach pH 7.15. The mixture was then concentrated to dryness under vacuum and the residual solid was extracted twice with 150 mL of methanol. The methanolic solution was dried on sodium sulphate, filtered and then concentrated to dryness under vacuum to give 4.80 g of white solid corresponding to (**1k**) (zwitterionic form). Yield: 89 % (white solid). FT-IR: 3356, 3037, 2976, 1589, 1543 cm<sup>-1</sup>. <sup>1</sup>H NMR (400 MHz, D<sub>2</sub>O): 1.32 (3H, t, <sup>3</sup>J=7.6Hz), 3.15 (2H, q, <sup>3</sup>J=7.6Hz), 4.24 (2H, s), 7.48 (2H, d, <sup>3</sup>J=8.4Hz), 7.85 (2H, d, <sup>3</sup>J=8.4Hz).

#### Ethyl 4-((ethylamino)methyl)-benzoate (**1l**):

A suspension of 2.61 g (14.56 mmol) of (**1k**) and of 3.06 g (17.77 mmol) of *p*-toluenesulfonic acid in a mixture 100 mL of dry toluene and 100 mL of ethanol was heated at reflux for 6 hours in a round bottom flask equipped with a Dean-Stark apparatus. After cooling the obtained solution, 50 mL of diethyl ether was added, and the suspension was stirred 15 min, then filtered and washed 3 times with diethyl ether. The solid was solubilized in 50 mL cold water and 25 mL. of NaOH 1N aq. was added dropwise. The aqueous solution was extracted 3 times with 10 mL of DCM. The combined organic layers are dried over Na<sub>2</sub>SO<sub>4</sub> and concentrated in vacuo (bath temperature 35°C to avoid amidification) to give 0.63 g of compound (**1l**) as a light yellow oil. Yield: 20 % (light yellow oil). FT-IR: 3313, 2966, 2933, 1712, 1610, 1271, 1101, 1020, 752 cm<sup>-1</sup>. <sup>1</sup>H NMR (400 MHz, CDCl<sub>3</sub>): 1.11 (3H, t, <sup>3</sup>J=7.2Hz), 1.26 (3H, t, <sup>3</sup>J=7.2Hz), 2.52 (2H, t, <sup>3</sup>J=6.4Hz), 2.66 (2H, q, <sup>3</sup>J=7.2Hz), 2.89 (2H, t, <sup>3</sup>J=6.4Hz), 4.14 (2H, q, <sup>3</sup>J=7.2Hz).

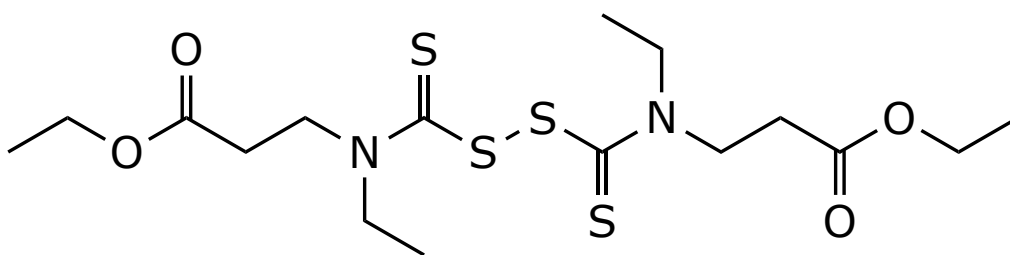

**2g**

Chemical Formula:  $\text{C}_{16}\text{H}_{28}\text{N}_2\text{O}_4\text{S}_4$   
Exact Mass: 440.0932

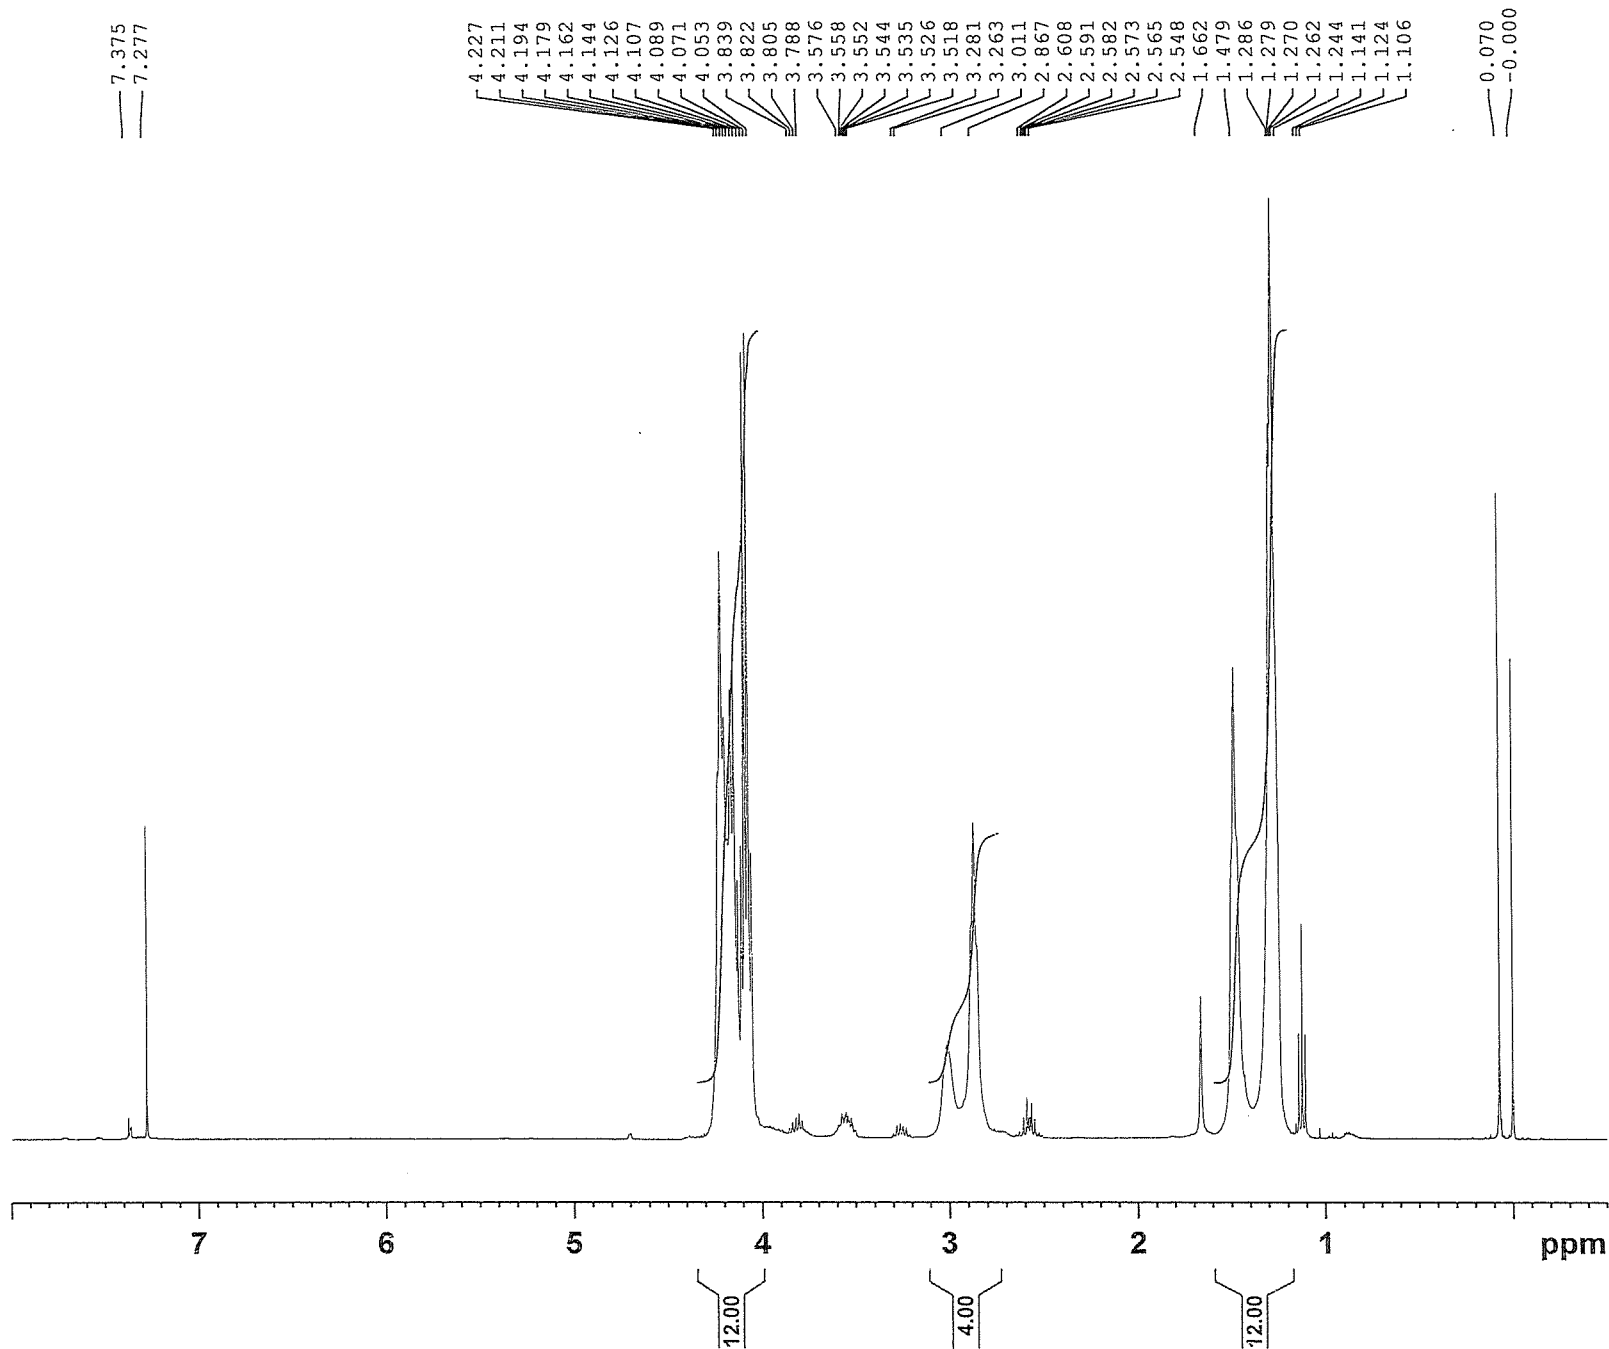

Current Data Parameters  
 NAME SN0321-L1  
 EXPNO 10  
 PROCNO 1

F2 - Acquisition Parameters  
 Date\_ 20200821  
 Time 15.02  
 INSTRUM spect  
 PROBHD 5 mm PABBO BB/  
 PULPROG zg30  
 TD 32768  
 SOLVENT CDC13  
 NS 16  
 DS 2  
 SWH 7978.724 Hz  
 FIDRES 0.243491 Hz  
 AQ 2.0534613 sec  
 RG 54.03  
 DW 62.667 usec  
 DE 6.50 usec  
 TE 296.2 K  
 D1 1.00000000 sec  
 TD0 1

===== CHANNEL f1 =====  
 SFO1 399.7524686 MHz  
 NUC1 1H  
 P1 9.00 usec  
 PLW1 19.20000076 W

F2 - Processing parameters  
 SI 65536  
 SF 399.7500030 MHz  
 WDW EM  
 SSB 0  
 LB 0.30 Hz  
 GB 0  
 PC 1.00

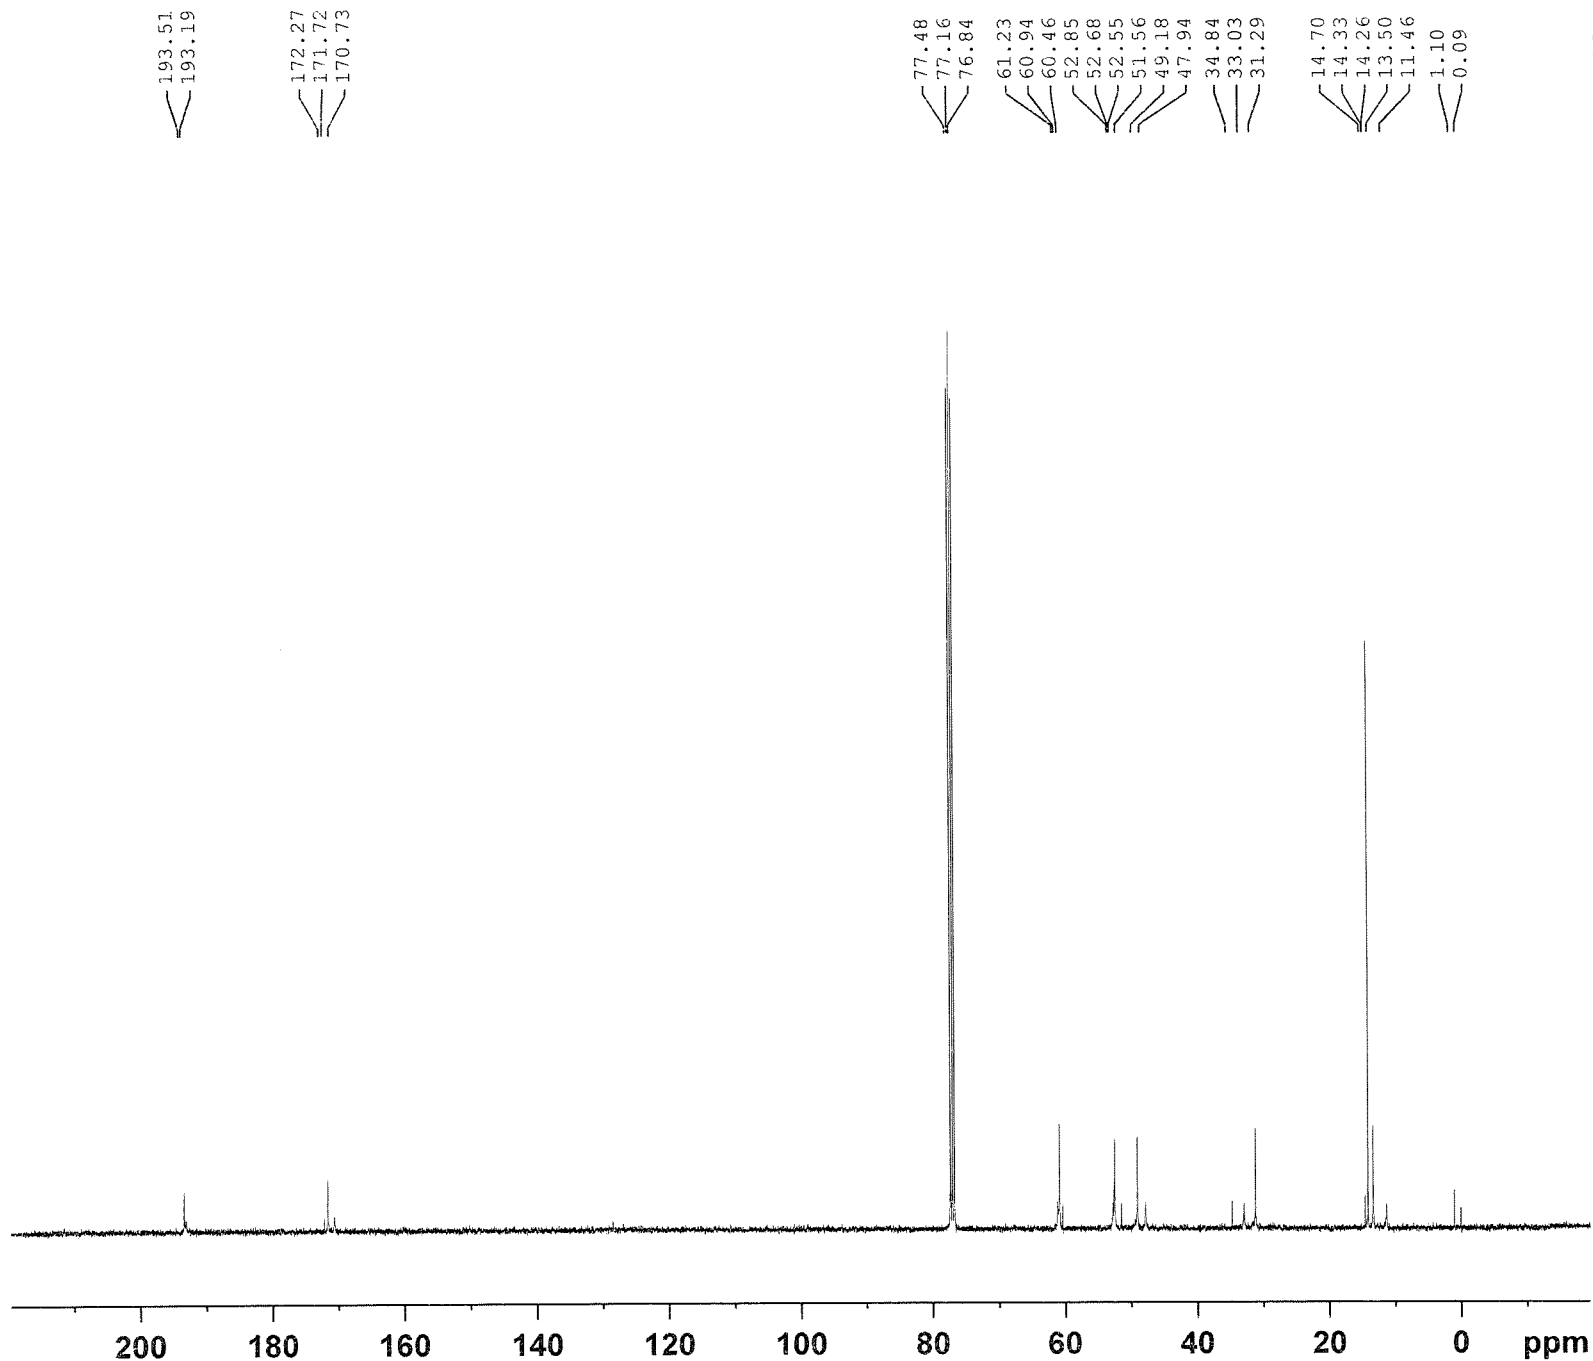

Current Data Parameters  
NAME SN0321-L1  
EXPNO 11  
PROCNO 1

F2 - Acquisition Parameters  
Date\_ 20200821  
Time\_ 20.05  
INSTRUM spect  
PROBHD 5 mm PABBO BB/  
PULPROG zgpg30  
TD 65536  
SOLVENT CDCl3  
NS 1024  
DS 4  
SWH 24038.461 Hz  
FIDRES 0.366798 Hz  
AQ 1.3631488 sec  
RG 199.3  
DW 20.800 usec  
DE 6.50 usec  
TE 295.0 K  
D1 2.00000000 sec  
D11 0.03000000 sec  
TD0 1

===== CHANNEL f1 =====  
SFO1 100.5272687 MHz  
NUC1 13C  
P1 8.60 usec  
PLW1 87.00000000 W

===== CHANNEL f2 =====  
SFO2 399.7515990 MHz  
NUC2 1H  
CPDPRG[2] waltz16  
PCPD2 90.00 usec  
PLW2 19.20000076 W  
PLW12 0.20000000 W  
PLW13 0.15552001 W

F2 - Processing parameters  
SI 32768  
SF 100.5172100 MHz  
WDW EM  
SSB 0  
LB 1.00 Hz  
GB 0  
PC 1.40

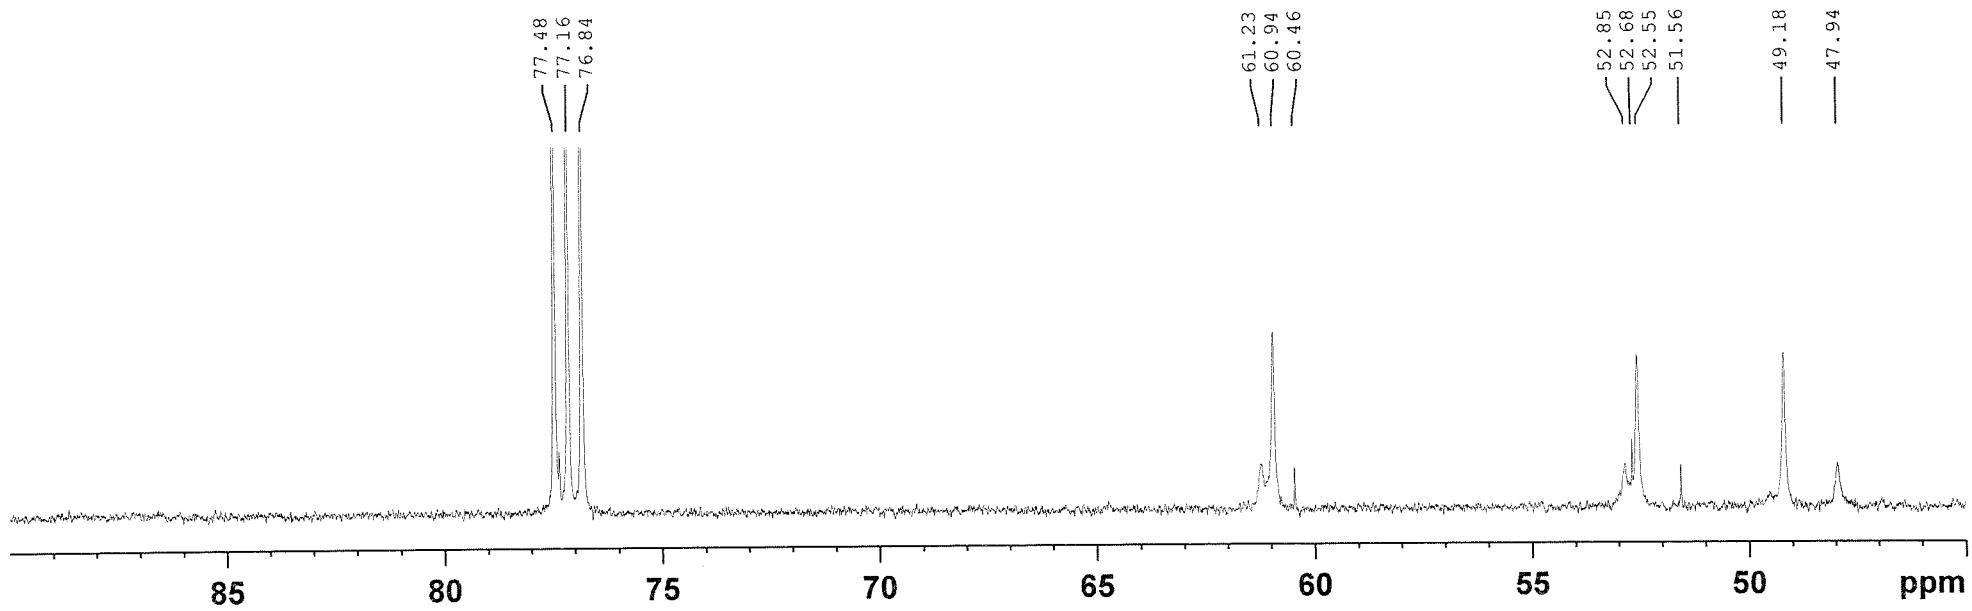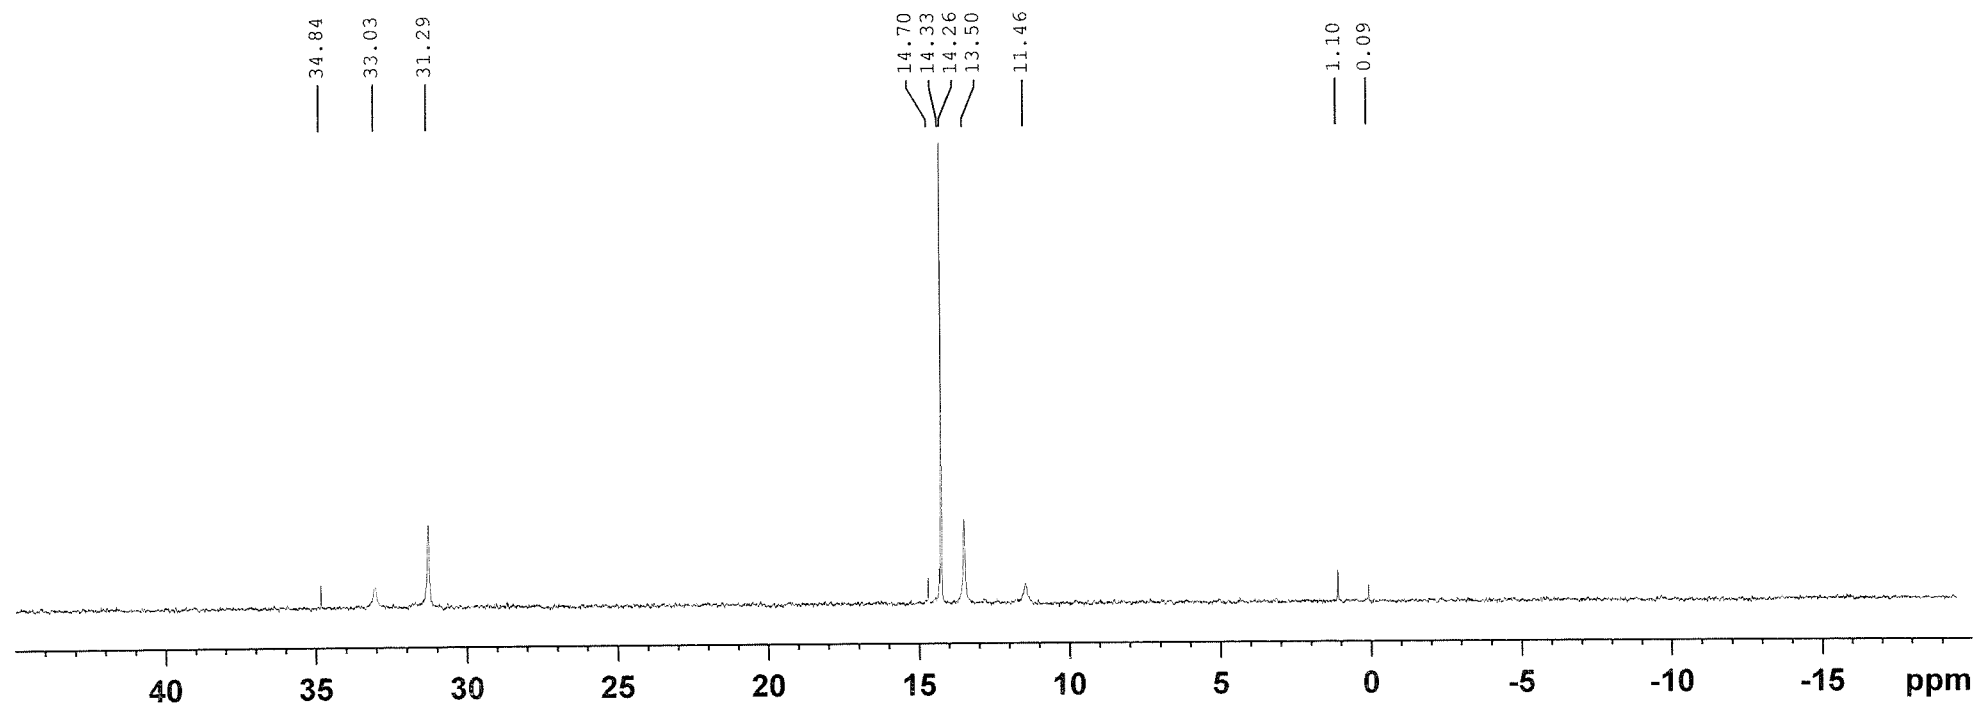

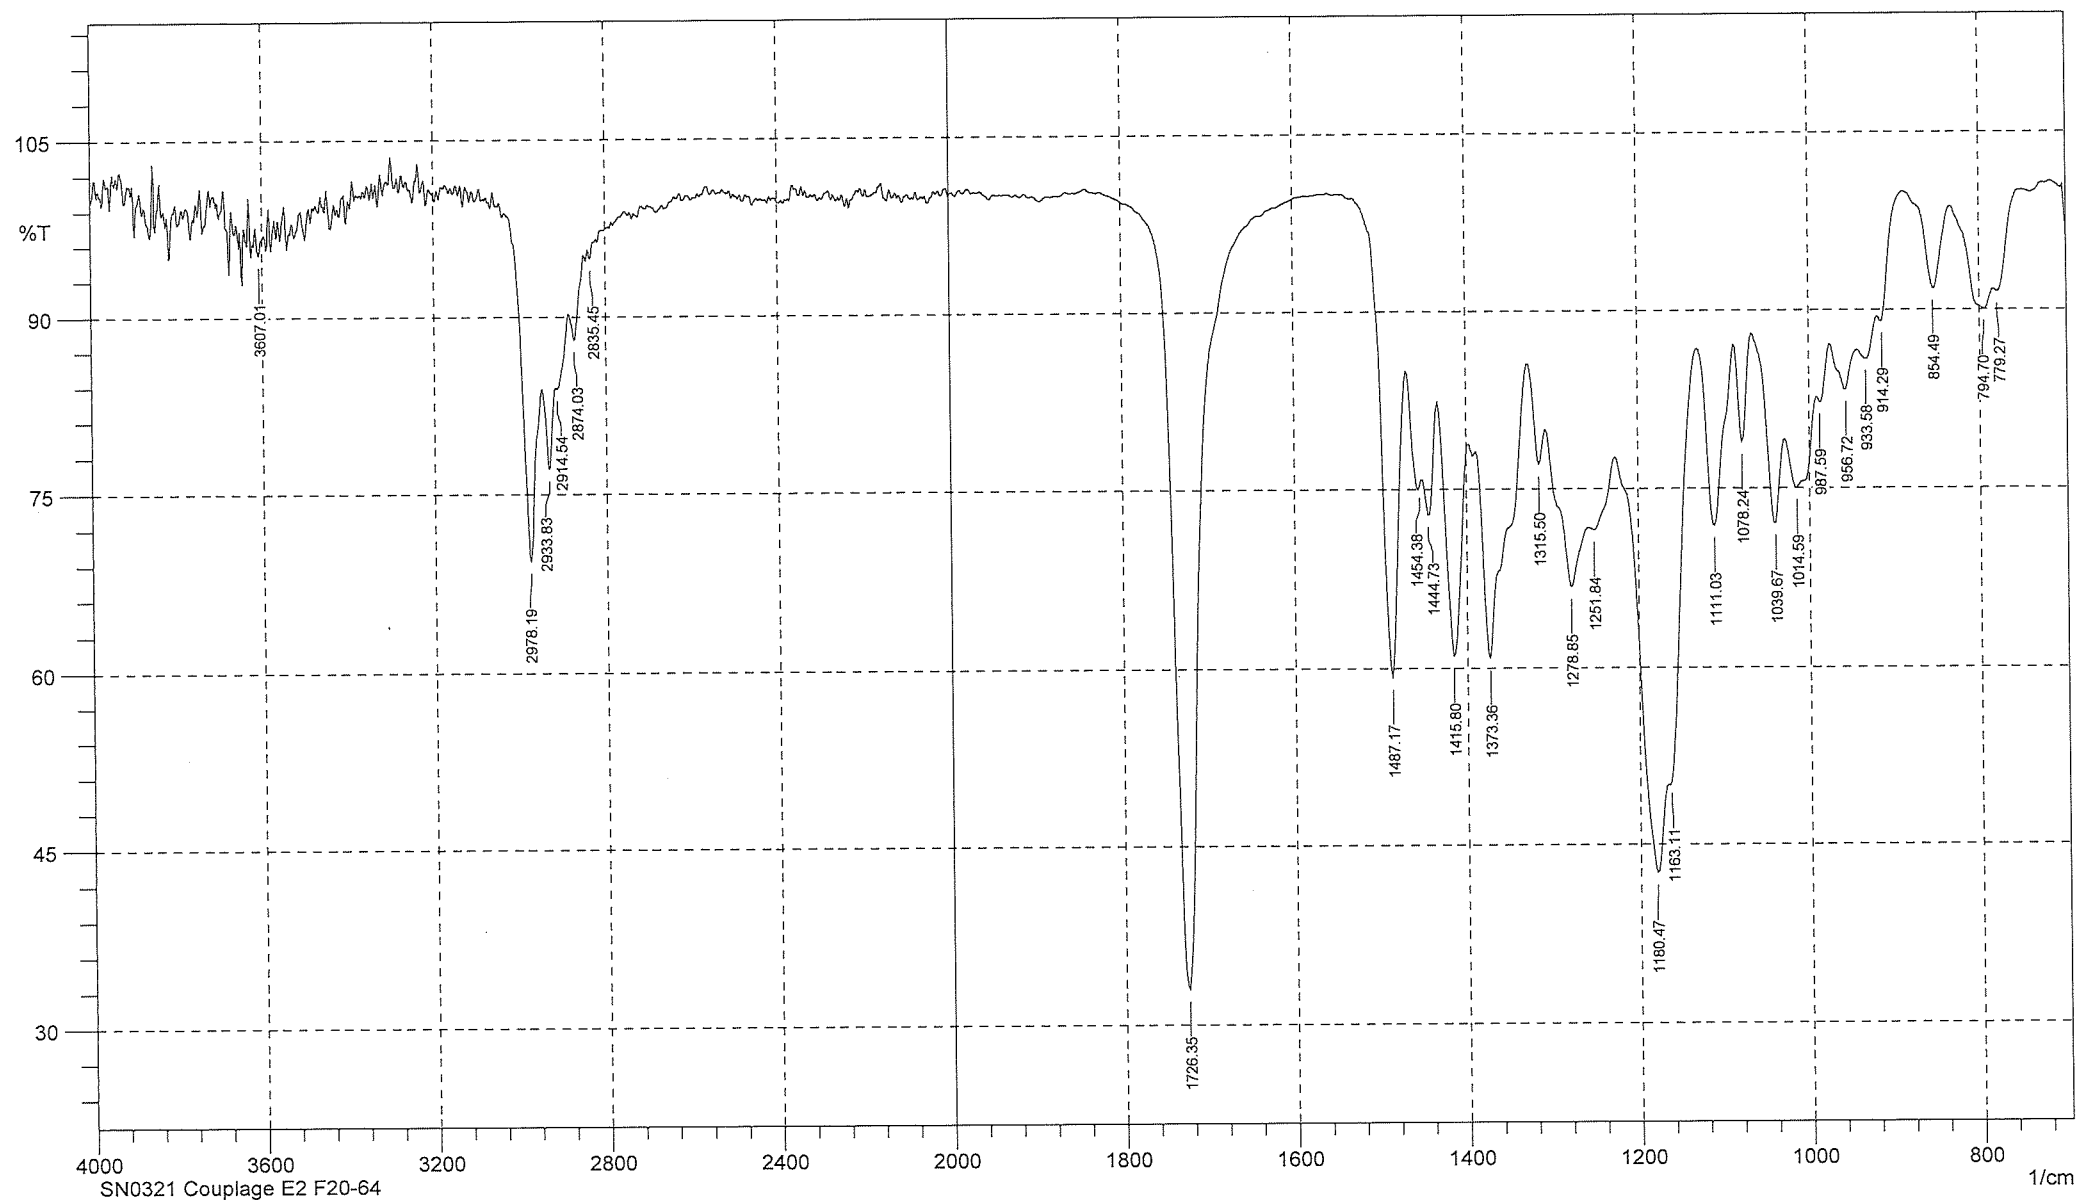

Comment;  
SN0321 Couplage E2 F20-64

No. of Scans;  
Resolution;  
Apodization;

Date/Time; 21/08/2020 09:14:03  
User; Administrateur



# Elemental Composition Report

Page 1

## Multiple Mass Analysis: 2 mass(es) processed

Tolerance = 5.0 PPM / DBE: min = 0.0, max = 7.0

Element prediction: Off

Number of isotope peaks used for i-FIT = 4

Monoisotopic Mass, Even Electron Ions

2538 formula(e) evaluated with 3 results within limits (all results (up to 1000) for each mass)

Elements Used:

C: 0-500 H: 0-1000 N: 0-3 O: 0-6 Na: 0-1 S: 0-4

2009016 78 (0.471) Cm (76:79-(4:14+406:411))

02-Sep-2020

SN0321L1

1: TOF MS ES+

2.64e+004

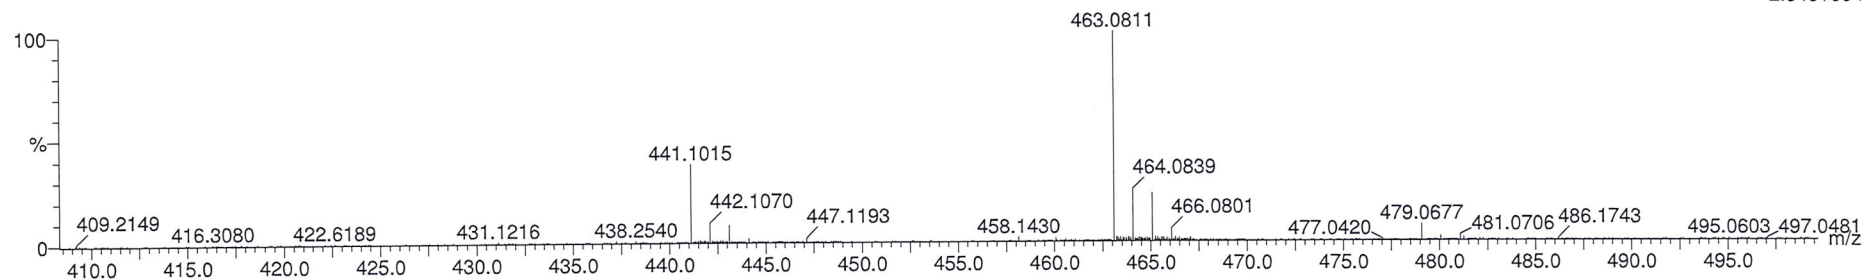

Minimum: 25.00  
Maximum: 100.00

| Mass     | RA     | Calc. Mass | mDa  | PPM  | DBE | i-FIT | i-FIT (Norm) | Formula |     |    |    |       |
|----------|--------|------------|------|------|-----|-------|--------------|---------|-----|----|----|-------|
| 441.1015 | 37.13  | 441.1010   | 0.5  | 1.1  | 3.5 | 397.3 | 3.3          | C16     | H29 | N2 | O4 | S4    |
|          |        | 441.1026   | -1.1 | -2.5 | 4.5 | 394.1 | 0.0          | C19     | H30 | O2 | Na | S4    |
| 463.0811 | 100.00 | 463.0830   | -1.9 | -4.1 | 3.5 | 576.2 | 0.0          | C16     | H28 | N2 | O4 | Na S4 |

SN0321L1

02-Sep-2020

2009016 78 (0.471) Cm (76:79-(4:14+406:411))

1: TOF MS ES+  
2.64e4

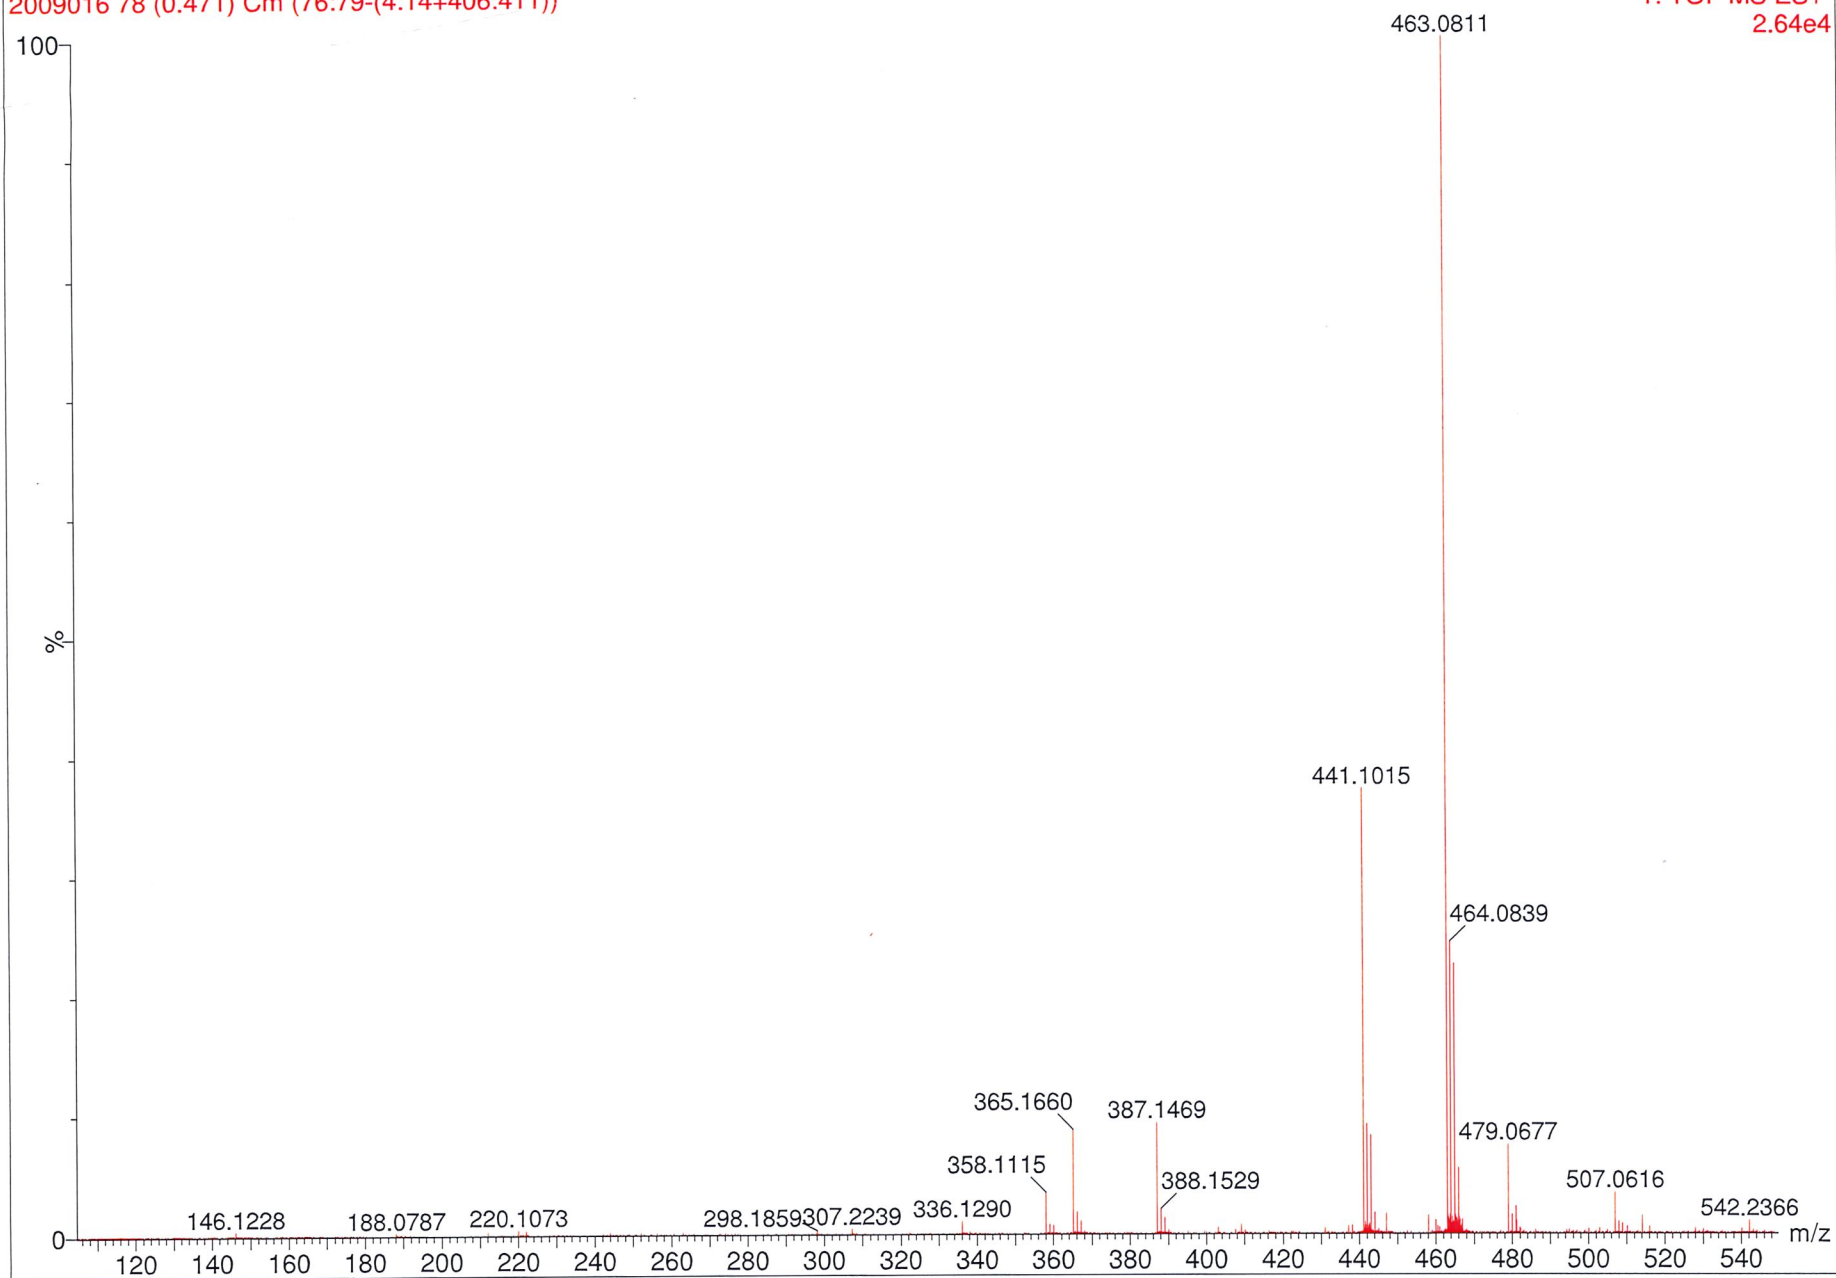

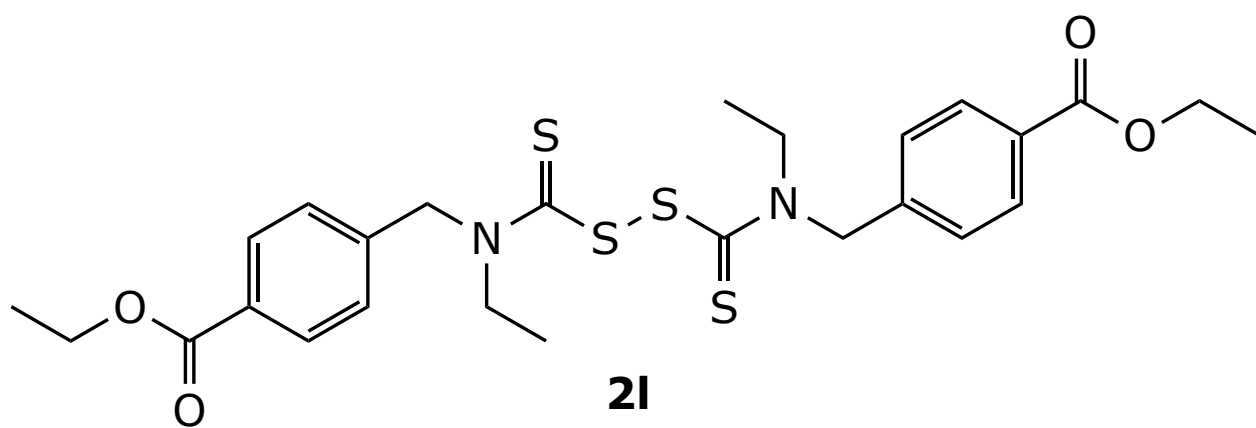

Chemical Formula: C<sub>26</sub>H<sub>32</sub>N<sub>2</sub>O<sub>4</sub>S<sub>4</sub>  
Exact Mass: 564.1245

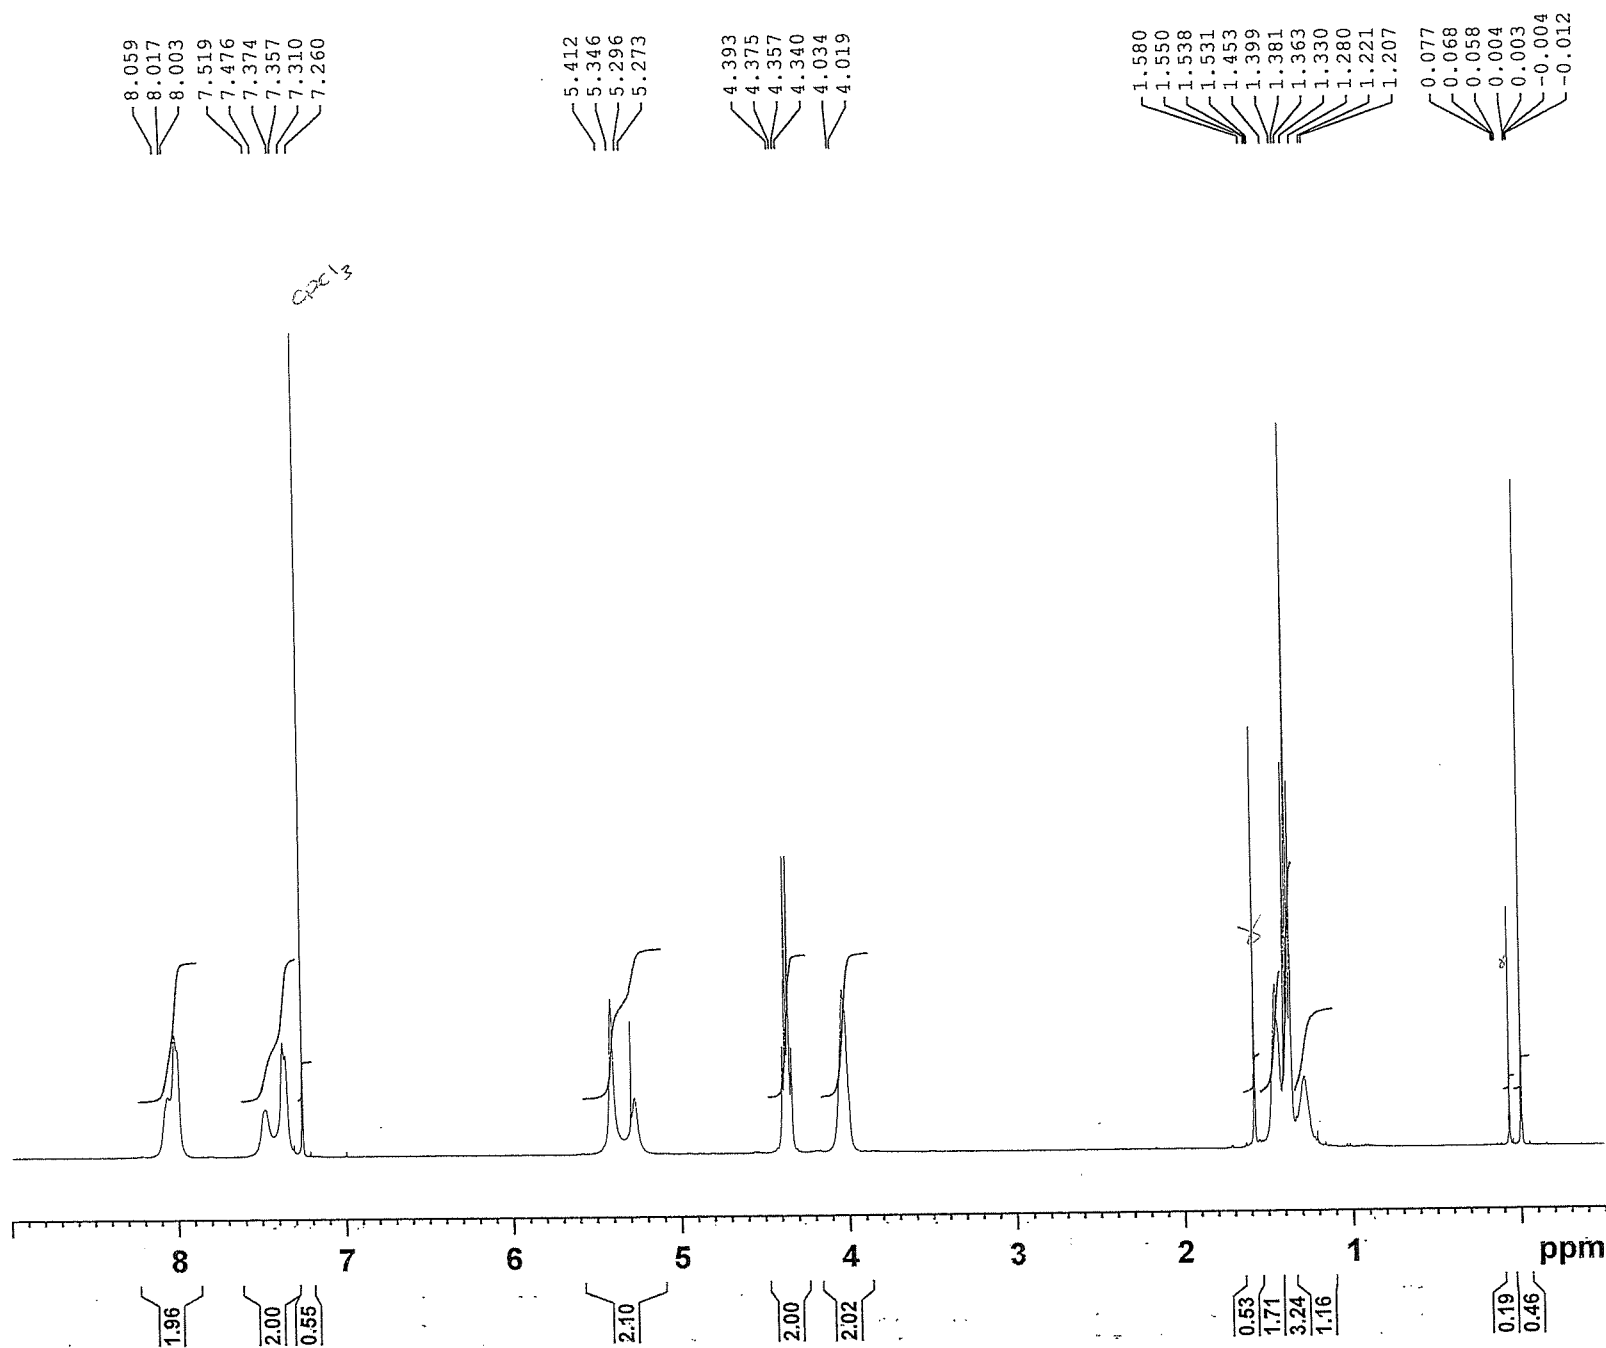

Current Data Parameters  
 NAME SN0317-L1  
 EXPNO 10  
 PROCNO 1

F2 - Acquisition Parameters  
 Date\_ 20200706  
 Time\_ 17.46  
 INSTRUM spect  
 PROBHD 5 mm PABBO BB/  
 PULPROG zg30  
 TD 32768  
 SOLVENT CDCl<sub>3</sub>  
 NS 16  
 DS 2  
 SWH 7978.724 Hz  
 FIDRES 0.243491 Hz  
 AQ 2.0534613 sec  
 RG 107.99  
 DW 62.667 usec  
 DE 6.50 usec  
 TE 296.2 K  
 D1 1.00000000 sec  
 TD0 1

===== CHANNEL f1 =====  
 SF01 399.7524686 MHz  
 NUC1 1H  
 P1 9.00 usec  
 PLW1 19.20000076 W

F2 - Processing parameters  
 SI 65536  
 SF 399.7500097 MHz  
 WDW EM  
 SSB 0  
 LB 0.30 Hz  
 GB 0  
 PC 1.00

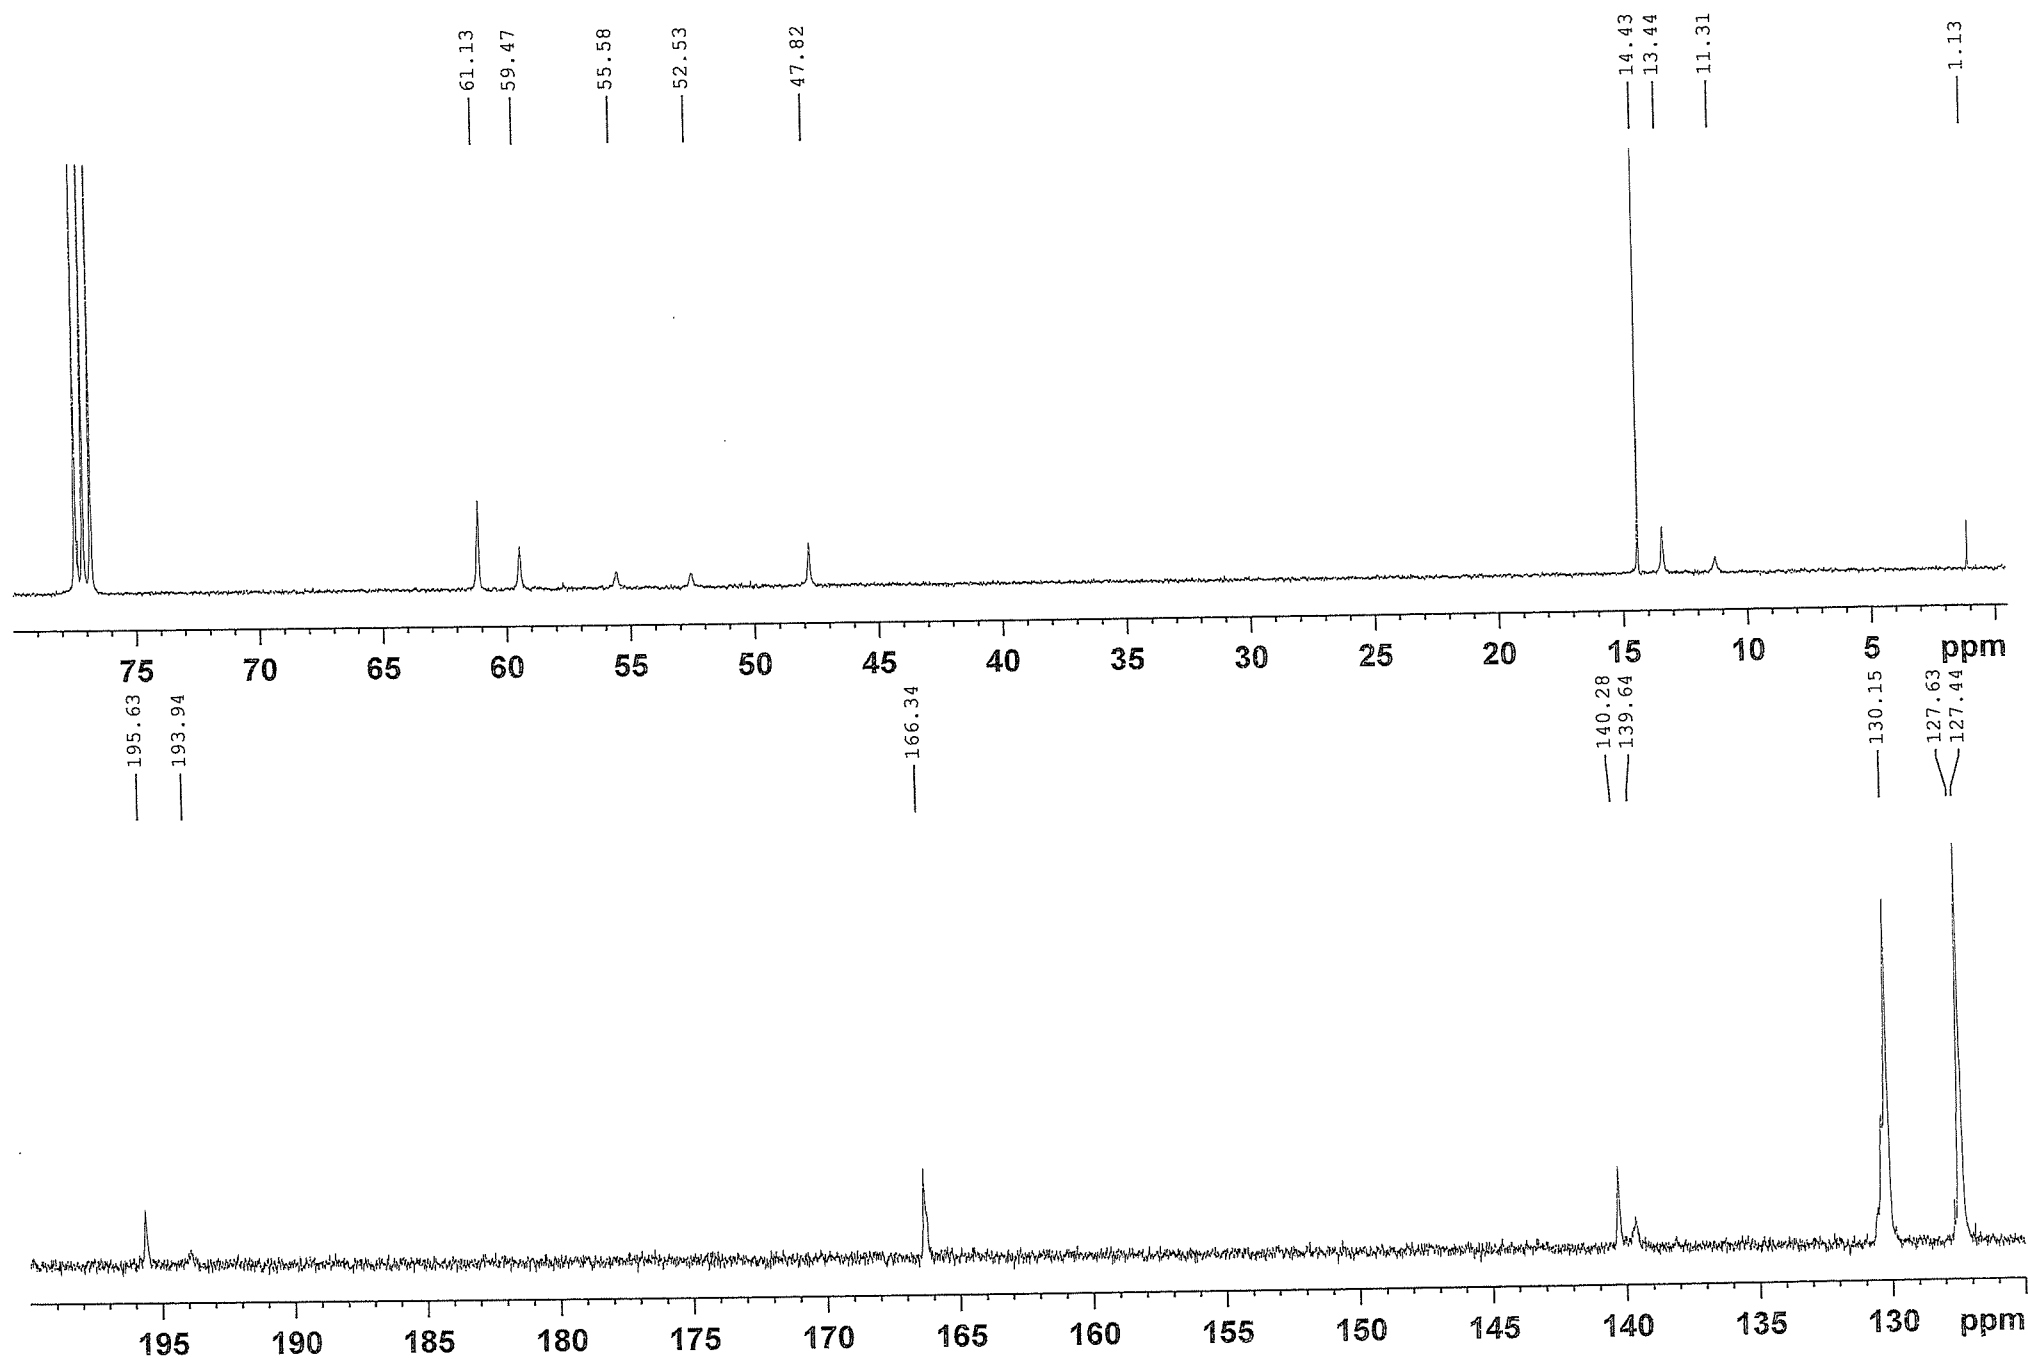

195.63  
193.94

166.34

140.28  
139.64

130.15  
127.63  
127.44

61.13  
59.47  
55.58  
52.53  
47.82

14.43  
13.44  
11.31

1.13 Current Data Parameters  
NAME SN0317  
EXPNO 20  
PROCNO 1

# F2 - Acquisition Parameters

Date\_ 20200716  
Time\_ 23.05  
INSTRUM spect  
PROBHD 5 mm PABBO BB/  
PULPROG zgpg30  
TD 65536  
SOLVENT CDC13  
NS 2048  
DS 4  
SWH 24038.461 Hz  
FIDRES 0.366798 Hz  
AQ 1.3631488 sec  
RG 199.3  
DW 20.800 usec  
DE 6.50 usec  
TE 295.0 K  
D1 2.00000000 sec  
D11 0.03000000 sec  
TD0 1

## ===== CHANNEL f1 =====

SFO1 100.5272687 MHz  
NUC1 13C  
P1 8.60 usec  
PLW1 87.00000000 W

## ===== CHANNEL f2 =====

SFO2 399.7515990 MHz  
NUC2 1H  
CPDPRG[2] waltz16  
PCPD2 90.00 usec  
PLW2 19.20000076 W  
PLW12 0.20000000 W  
PLW13 0.15552001 W

## F2 - Processing parameters

SI 32768  
SF 100.5172086 MHz  
WDW EM  
SSB 0  
LB 1.00 Hz  
GB 0  
PC 1.40

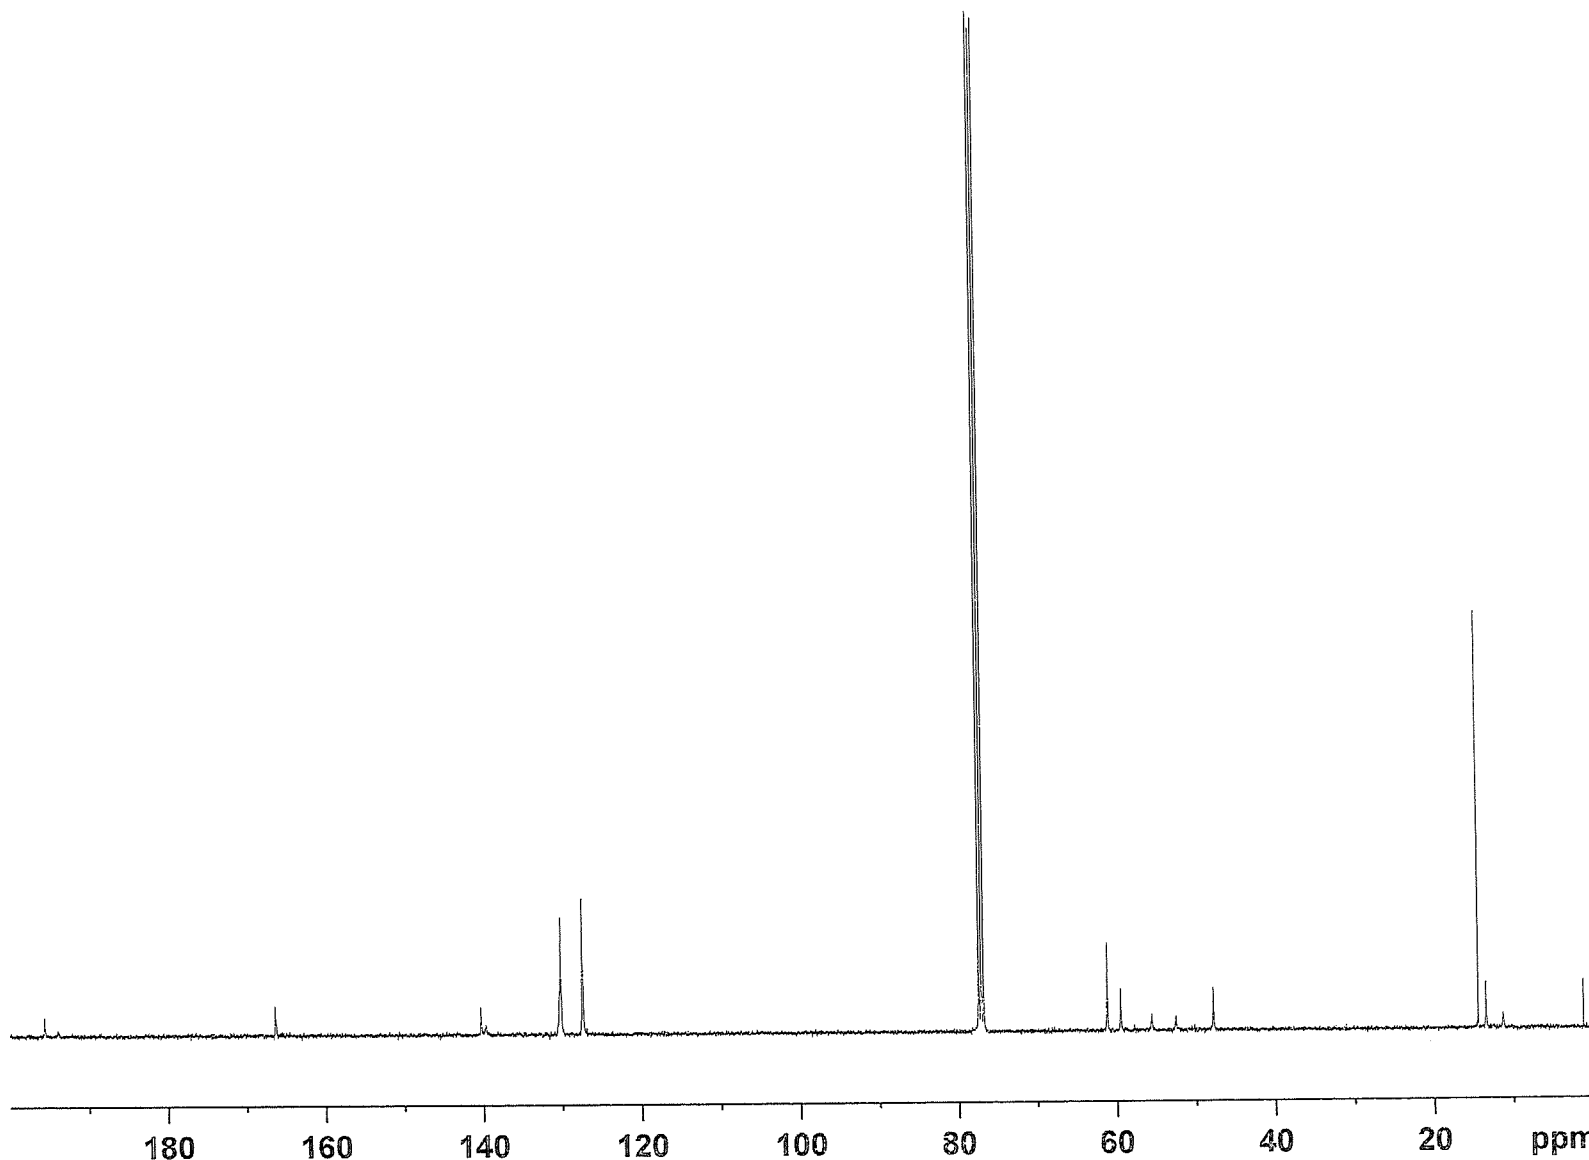

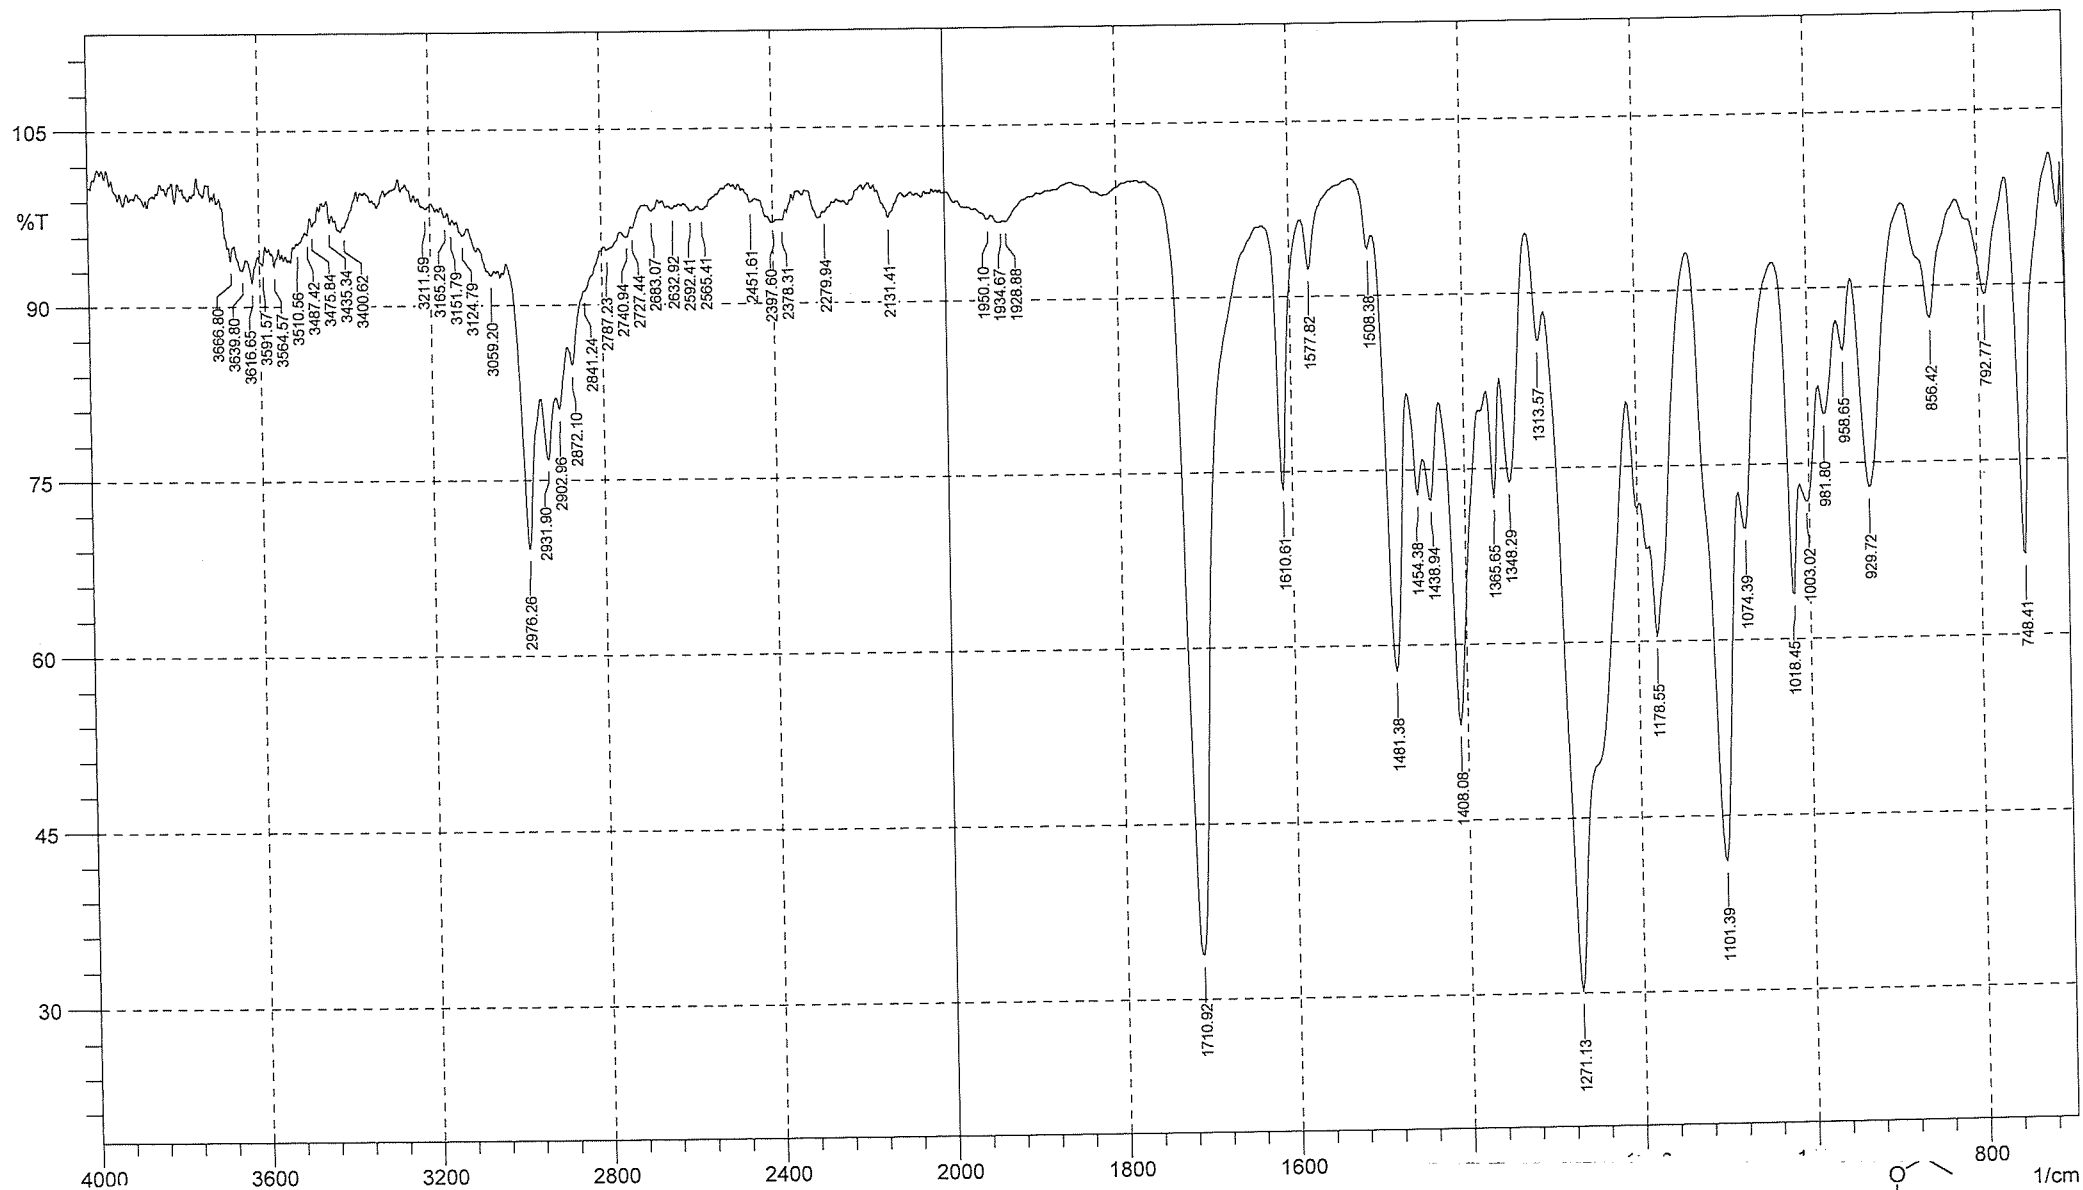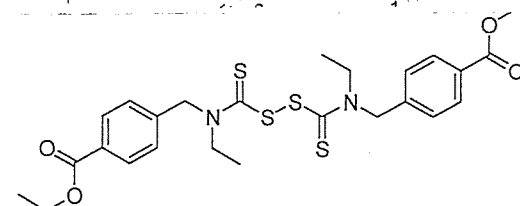

## Elemental Composition Report

## Single Mass Analysis

Tolerance = 10.0 PPM / DBE: min = 0.0, max = 15.0

Element prediction: Off

Number of isotope peaks used for i-FIT = 4

Monoisotopic Mass, Even Electron Ions

1096 formula(e) evaluated with 1 results within limits (all results (up to 1000) for each mass)

Elements Used:

C: 0-500 H: 0-1000 N: 0-5 O: 0-5 S: 0-4

2007172 297 (1.807) Cm (290:304)

17-Jul-2020

SN0317L1

1: TOF MS ES+

1.59e+004

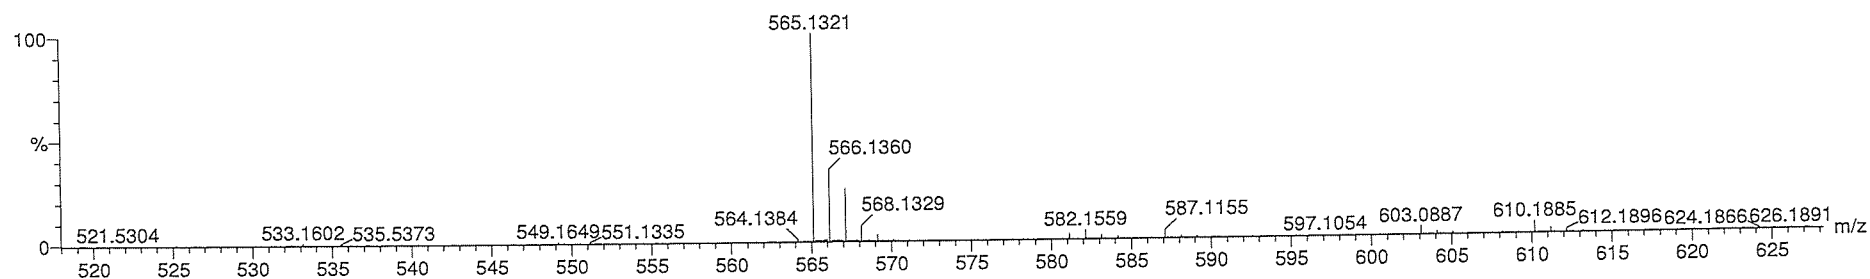

Minimum: 0.0  
 Maximum: 5.0 10.0 15.0

| Mass     | Calc. Mass | mDa  | PPM  | DBE  | i-FIT | i-FIT (Norm) | Formula          |
|----------|------------|------|------|------|-------|--------------|------------------|
| 565.1321 | 565.1323   | -0.2 | -0.4 | 11.5 | 543.8 | 0.0          | C26 H33 N2 O4 S4 |
